# Supplementary material for: Optical diffusers with enhanced properties based on novel polysiloxane@CeO2@PMMA fillers
Source: Royal Society of Chemistry journal article supplement (doi:10.1039/c4tc02287d), 2015-01-01
Supplement: c4tc02287d1.pdf [file c4tc02287d1.pdf]

# Supporting Information

## **Optical diffusers with enhanced properties based on novel fillers of polysiloxane@CeO<sub>2</sub>@PMMA**

Jingang Hu, Yuming Zhou<sup>\*</sup>, Xiaoli Sheng

School of Chemistry and Chemical Engineering, Southeast University, Optoelectronic  
Functional Materials and Engineering Laboratory, Jiangsu, Nanjing 211189, PR China

<sup>\*</sup>Corresponding author: Tel +86-25-52090617; Fax +86-25-52090617;  
E-mail address: ymzhou@seu.edu.cn (Y. Zhou).

## 1、 Preparation of polysiloxane@CeO<sub>2</sub>@PMMA

The preparation of polysiloxane@CeO<sub>2</sub>@PMMA core-shell microspheres using convenient method is as follows: 5 g MMA and 0.2 g KPS were dispersed in 200 mL deionized water, and the reaction was stirred for 4h at 75 °C (PMMA microspheres prepared). 7.6g Ce(NO<sub>3</sub>)<sub>3</sub>·6H<sub>2</sub>O and 12.2 g hexamethylenetetramine was dissolved in 50 mL deionized water, which was added to the above solution with stirring for 4 h at 75 °C again (CeO<sub>2</sub>@PMMA prepared). Then, 20 mL or 10 mL VTMS in 50 mL ethanol was dripped slowly within half an hour and the mixture was reacted for 8 h at 60 °C. Finally, the mixture was filtered and washed thoroughly with distilled water. It was dried in vacuum at 60 °C for 12 h to obtain polysiloxane@CeO<sub>2</sub>@PMMA.

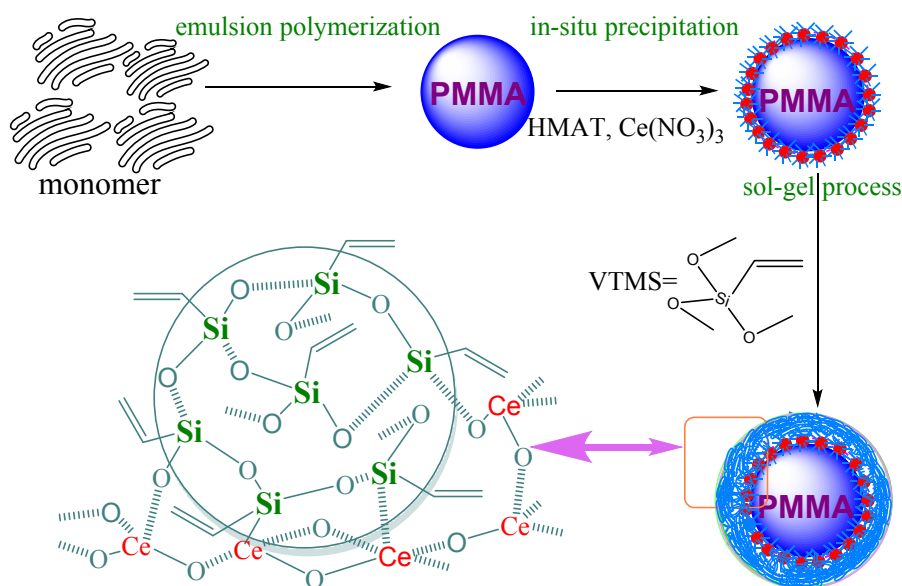

Figure S1. The synthesis route of polysiloxane@CeO<sub>2</sub>@PMMA.

## 2、 Structure of polysiloxane@CeO<sub>2</sub>@PMMA

### FT-IR Analysis

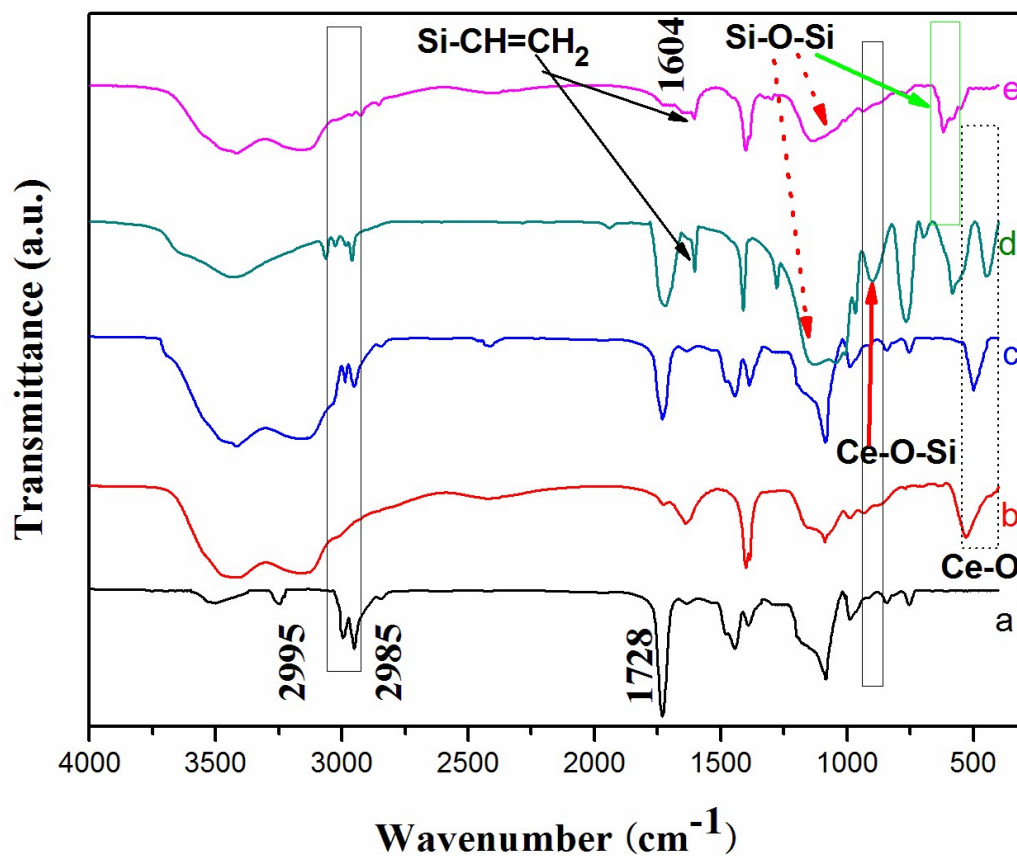

Figure S2. FT-IR spectra of (a) PMMA; (b) nano-CeO<sub>2</sub>; (c) CeO<sub>2</sub>@PMMA; (d) polysiloxane@CeO<sub>2</sub>@PMMA; (e) poly(VTMS).

## XRD Analysis

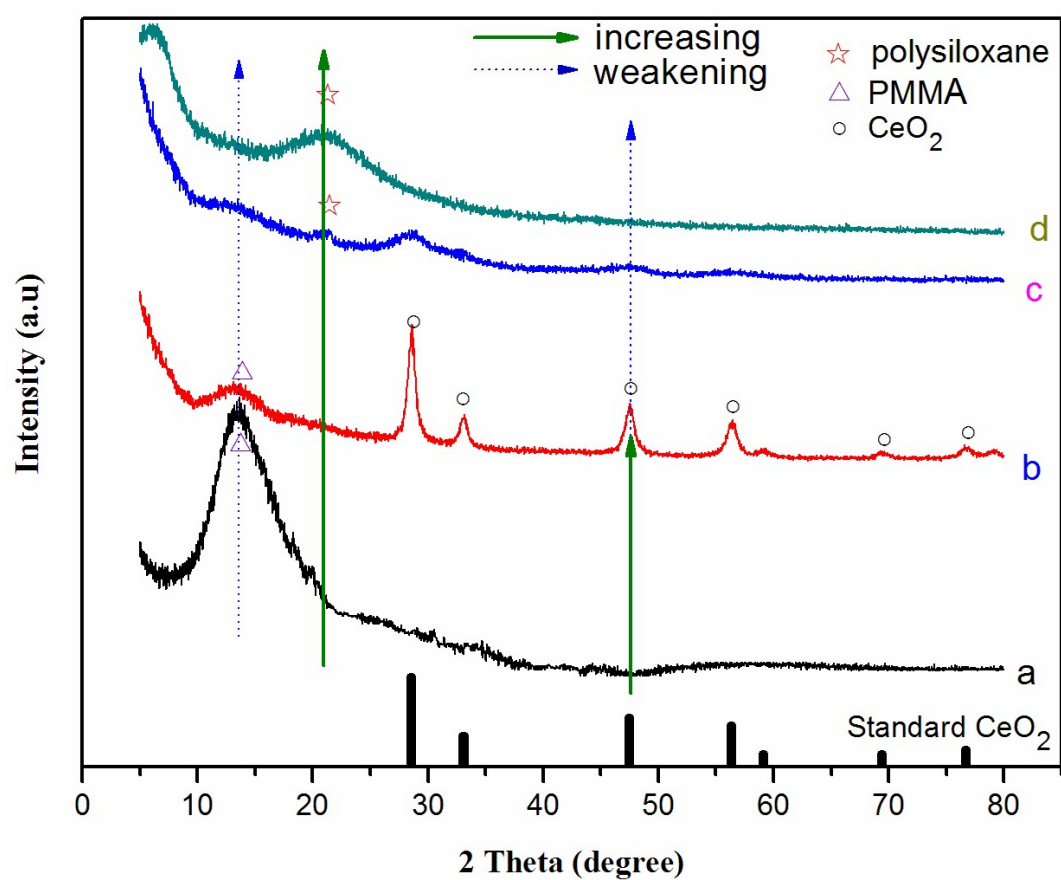

Figure S3. X-ray diffraction (XRD) patterns of (a) nano-CeO<sub>2</sub>, (b) CeO<sub>2</sub>@PMMA, (c) polysiloxane@CeO<sub>2</sub>@PMMA, (d) poly(VTMS).

## Morphology Analysis

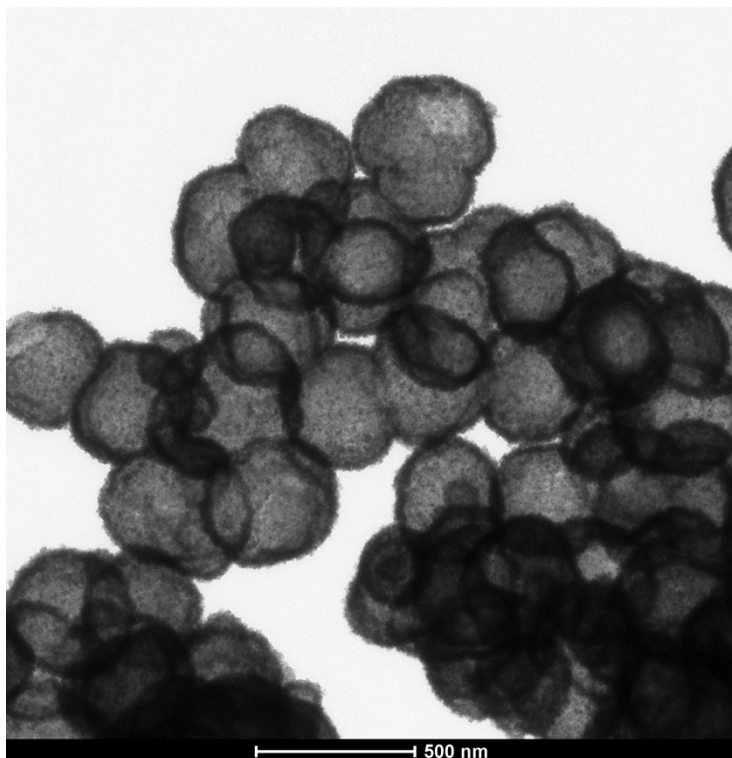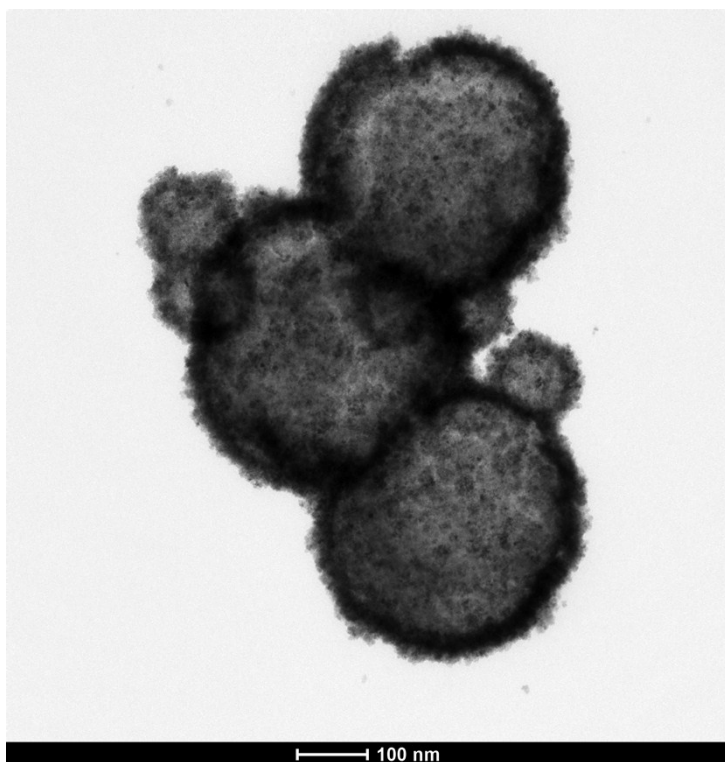

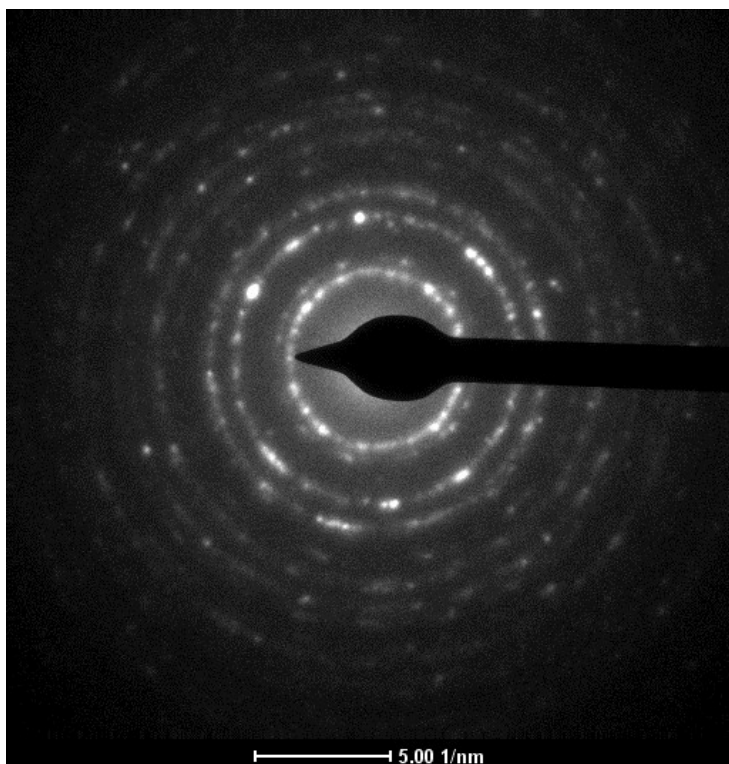

Figure S4. TEM image of  $\text{CeO}_2@\text{PMMA}$ .

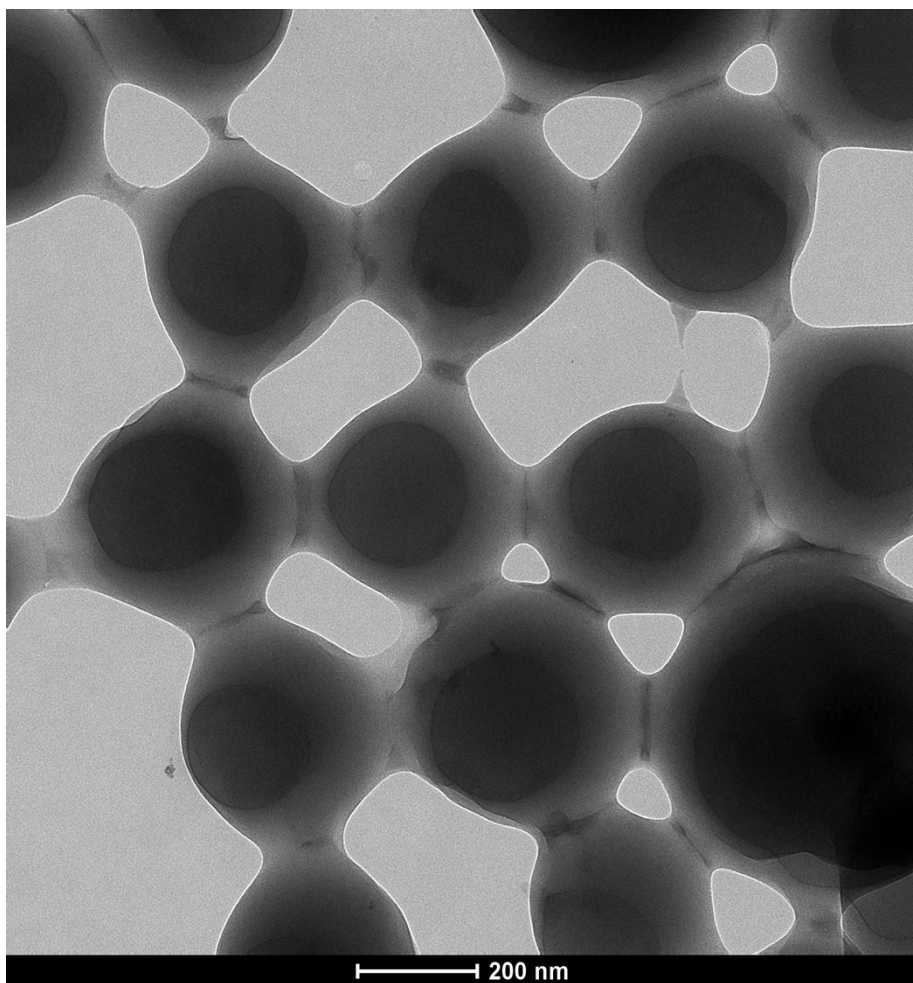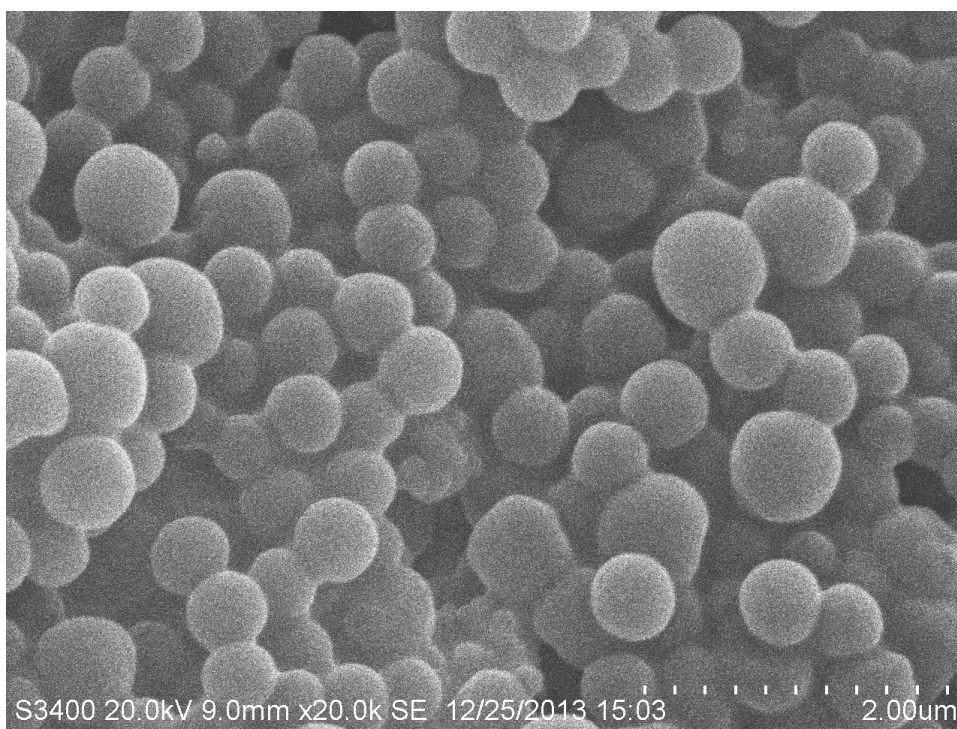

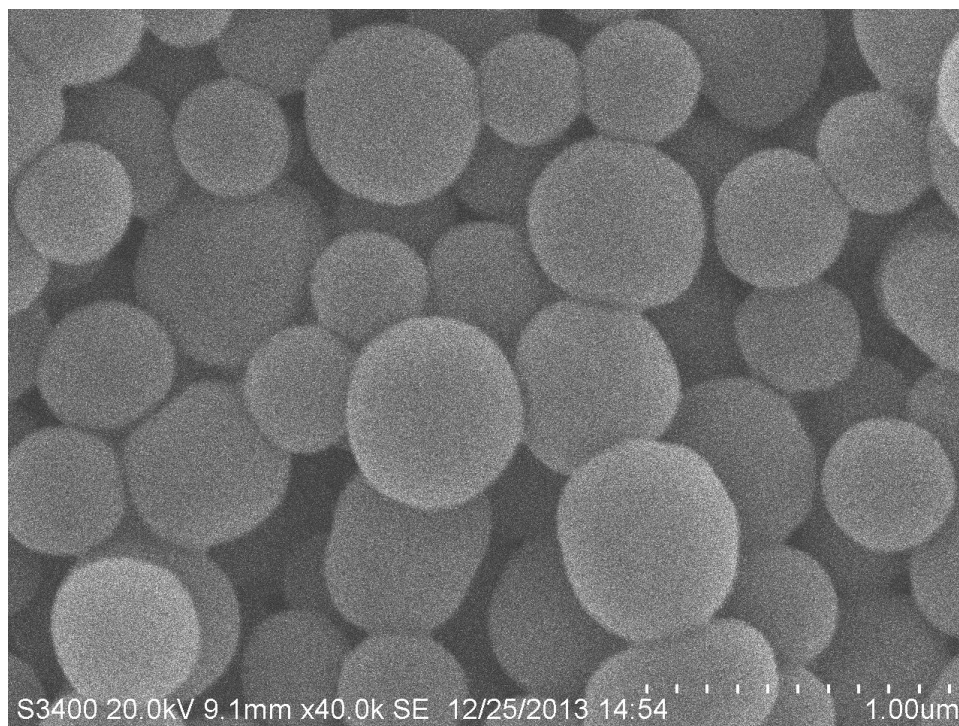

Figure S5. TEM image of polysiloxane@CeO<sub>2</sub>@PMMA and SEM image of polysiloxane@CeO<sub>2</sub>@PMMA.
